# Supplementary material for: Symptom burden and life challenges reported by adult chordoma patients and their caregivers
Source: PubMed Central journal article supplement (PMC5509836; doi:10.1007/s11136-017-1544-2), 2017-03-17
Supplement: 11136_2017_1544_MOESM1_ESM.pdf [file 11136_2017_1544_MOESM1_ESM.pdf]

# Chordoma Foundation - Chordoma Community Survey

## Demographics

Thank you for taking the time to complete this survey. The information that you provide will help us improve our services to the chordoma community.

Your answers will remain anonymous unless you choose to provide contact information on the last page of the survey. All responses will be treated as confidential.

Note: For questions about chordoma diagnosis and treatment, please answer from the perspective of the patient.

### 1. Gender

- Male
- Female

### 2. Age

- Under 18 years old
- 18-24 years old
- 25-34 years old
- 35-44 years old
- 45-54 years old
- 55-64 years old
- 65-74 years old
- 75 years or older

# Chordoma Foundation - Chordoma Community Survey

## 3. Education Level

- Some high school or secondary school
- High school or secondary school graduate
- Some college or university
- Trade/technical/vocational training
- College or university graduate
- Some postgraduate work
- Postgraduate degree

## \*4. Country:

## \*5. How are you affected by chordoma?

- Chordoma Patient
- Parent of Patient
- Spouse of Patient
- Family of Patient
- Friend of Patient
- None

## Chordoma Foundation - Chordoma Community Survey

### 6. Where in the body did your (the patient's) chordoma first arise? [Excluding tumors that may have metastasized (spread) to other parts of the body]

- Clivus (skull base)
- Cervical spine (neck)
- Thoracic spine (mid back)
- Lumbar spine (lower back)
- Sacrum (pelvic area)
- Coccyx (tail bone)
- Extra-axial (not in the spine or skull)
- Multi-focal (multiple locations along the spine or skull)
- Not Sure

### 7. What is the current status of your (the patient's) disease?

- Disease-free (no evidence of tumor)
- Stable local disease (tumor is present but not growing at the primary site)
- Progressive local disease (tumor is growing at the primary site)
- Stable metastatic disease (tumor has spread beyond the primary site but is not currently growing)
- Progressive metastatic disease (tumor has spread beyond the primary site and is currently growing)
- Not sure

Other (please specify)

# Chordoma Foundation - Chordoma Community Survey

## \*1. Is the patient alive?

- Yes - patient is alive
- No - patient is deceased

## 1. Date of death (MM/YYYY)

## \*1. Have you been a caregiver for a chordoma patient?

- Yes - I am/was a caregiver
- No - I am/was not a caregiver

# Chordoma Foundation - Chordoma Community Survey

## 1. Which of the following challenges have you faced in caring for someone with chordoma? Select all that apply.

- |                                                                                                   |                                                                                         |                                                                                            |
|---------------------------------------------------------------------------------------------------|-----------------------------------------------------------------------------------------|--------------------------------------------------------------------------------------------|
| <input type="checkbox"/> Delayed diagnosis of patient                                             | <input type="checkbox"/> Financial distress (including bankruptcy or foreclosure)       | <input type="checkbox"/> Grief                                                             |
| <input type="checkbox"/> Misdiagnosis of patient                                                  | <input type="checkbox"/> Feelings of loneliness or isolation                            | <input type="checkbox"/> Difficulty helping the patient cope with his/her illness          |
| <input type="checkbox"/> Patient received wrong or inappropriate care                             | <input type="checkbox"/> Family conflict                                                | <input type="checkbox"/> Difficulty helping children or other family members cope          |
| <input type="checkbox"/> Difficulty dealing with physicians or medical staff                      | <input type="checkbox"/> Confusion or unanswered questions about chordoma               | <input type="checkbox"/> Difficulty talking about chordoma and how it has affected my life |
| <input type="checkbox"/> Denial of insurance coverage for the patient's recommended treatment     | <input type="checkbox"/> Difficulty finding experienced physicians or treatment centers | <input type="checkbox"/> None                                                              |
| <input type="checkbox"/> Inability to pay for the patient's recommended treatment                 | <input type="checkbox"/> Change in career or reduced ability to work                    |                                                                                            |
| <input type="checkbox"/> Inability to pay for travel, lodging or other treatment-related expenses | <input type="checkbox"/> Loss of employment                                             |                                                                                            |
| <input type="checkbox"/> Other (please explain)                                                   |                                                                                         |                                                                                            |

# Chordoma Foundation - Chordoma Community Survey

## 1. Which of the following challenges have you faced as a result of your experience with chordoma? Select all that apply.

- |                                                                                                   |                                                                                         |                                                                                            |
|---------------------------------------------------------------------------------------------------|-----------------------------------------------------------------------------------------|--------------------------------------------------------------------------------------------|
| <input type="checkbox"/> Delayed diagnosis                                                        | <input type="checkbox"/> Financial distress (including bankruptcy or foreclosure)       | <input type="checkbox"/> Change in career or reduced ability to work                       |
| <input type="checkbox"/> Misdiagnosis                                                             | <input type="checkbox"/> Feelings of loneliness or isolation                            | <input type="checkbox"/> Loss of employment                                                |
| <input type="checkbox"/> Difficulty dealing with physicians or medical staff                      | <input type="checkbox"/> Family conflict                                                | <input type="checkbox"/> Loss of health insurance                                          |
| <input type="checkbox"/> Received wrong or inappropriate care                                     | <input type="checkbox"/> Confusion or unanswered questions about chordoma               | <input type="checkbox"/> Difficulty coping with my illness                                 |
| <input type="checkbox"/> Denial of insurance coverage for recommended treatment                   | <input type="checkbox"/> Difficulty finding experienced physicians or treatment centers | <input type="checkbox"/> Difficulty helping children or other family members cope          |
| <input type="checkbox"/> Inability to pay for recommended treatment                               | <input type="checkbox"/> Short-term disability                                          | <input type="checkbox"/> Difficulty talking about chordoma and how it has affected my life |
| <input type="checkbox"/> Inability to pay for travel, lodging or other treatment-related expenses | <input type="checkbox"/> Long-term disability                                           | <input type="checkbox"/> None                                                              |
| <input type="checkbox"/> Other (please explain)                                                   |                                                                                         |                                                                                            |

## Experience with Chordoma

Please tell us more about your (the patient's) experience with chordoma.

Note: Family members, please answer all questions from the patient's perspective.

# Chordoma Foundation - Chordoma Community Survey

## 1. What symptoms or situation led to the discovery of your (the patient's) tumor? Select all that apply.

- |                                                                                          |                                                                    |                                                  |
|------------------------------------------------------------------------------------------|--------------------------------------------------------------------|--------------------------------------------------|
| <input type="checkbox"/> Back pain                                                       | <input type="checkbox"/> Difficulty walking                        | <input type="checkbox"/> Other changes in vision |
| <input type="checkbox"/> Balance difficulty                                              | <input type="checkbox"/> Double vision                             | <input type="checkbox"/> Other Pain              |
| <input type="checkbox"/> Bowel obstruction                                               | <input type="checkbox"/> Facial drooping or facial nerve paralysis | <input type="checkbox"/> Sexual dysfunction      |
| <input type="checkbox"/> Discovered incidentally following an injury or accident         | <input type="checkbox"/> Fainting                                  | <input type="checkbox"/> Stiffness               |
| <input type="checkbox"/> Discovered incidentally through treatment for another condition | <input type="checkbox"/> Fecal incontinence                        | <input type="checkbox"/> Urinary retention       |
| <input type="checkbox"/> Difficulty breathing                                            | <input type="checkbox"/> Gastrointestinal changes                  | <input type="checkbox"/> Urinary incontinence    |
| <input type="checkbox"/> Difficulty sitting                                              | <input type="checkbox"/> Neck pain                                 |                                                  |
| <input type="checkbox"/> Difficulty swallowing or speaking                               | <input type="checkbox"/> Numbness or tingling                      |                                                  |
| <input type="checkbox"/> Other (please explain)                                          |                                                                    |                                                  |

## 2. When did you (the patient) first experience the onset of these symptoms? (MM/YYYY)

## 3. Before your (the patient's) tumor was discovered, what else, if anything, were you told could be causing these symptoms?

## 4. When was your (the patient's) tumor first discovered? (MM/YYYY)

## Chordoma Foundation - Chordoma Community Survey

**5. Once a tumor was discovered and before the diagnosis was confirmed, what else were you (the patient) told the tumor could possibly be besides chordoma? Select all that apply.**

- |                                                        |                                            |
|--------------------------------------------------------|--------------------------------------------|
| <input type="checkbox"/> Benign bone tumor             | <input type="checkbox"/> Epidermoid        |
| <input type="checkbox"/> Benign notochordal cell tumor | <input type="checkbox"/> Infection         |
| <input type="checkbox"/> Bone cancer or tumor          | <input type="checkbox"/> Meningioma        |
| <input type="checkbox"/> Brain cancer or tumor         | <input type="checkbox"/> Metastatic cancer |
| <input type="checkbox"/> Chondrosarcoma                | <input type="checkbox"/> Notochordal rest  |
| <input type="checkbox"/> Congenital defect             | <input type="checkbox"/> Stress fracture   |
| <input type="checkbox"/> Cyst                          |                                            |
| <input type="checkbox"/> Other (please explain)        |                                            |

**6. Was the first definitive diagnosis you (the patient) received the correct diagnosis of chordoma?**

- Yes
- No

If no, what wrong diagnosis did you receive?

**7. When did you (the patient) receive a confirmed diagnosis of chordoma? (MM/YYYY)**



# Chordoma Foundation - Chordoma Community Survey

## 8. What treatments have you (the patient) had? Select all that apply.

- Carbon ion therapy
- Chemotherapy
- Immune therapy (including a cancer vaccine or immune checkpoint inhibitor)
- Intensity modulated radiotherapy (IMRT)
- Proton beam radiation
- Surgery
- Stereotactic Radiosurgery (including CyberKnife and Gamma Knife)
- Targeted therapy (including drugs such as Gleevec, Tarceva, Avastin, etc.)
- Have not had treatment

Other (please explain)

## 9. At which hospitals have you (the patient) been treated?

|            |                      |
|------------|----------------------|
| Hospital 1 | <input type="text"/> |
| Hospital 2 | <input type="text"/> |
| Hospital 3 | <input type="text"/> |
| Hospital 4 | <input type="text"/> |
| Hospital 5 | <input type="text"/> |

# Chordoma Foundation - Chordoma Community Survey

## 10. Which of the following health effects have you (the patient) ever suffered as a result of chordoma? Select all that apply.

- |                                                 |                                                       |                                                |
|-------------------------------------------------|-------------------------------------------------------|------------------------------------------------|
| <input type="checkbox"/> Balance impairment     | <input type="checkbox"/> Depression or severe anxiety | <input type="checkbox"/> Other vision problems |
| <input type="checkbox"/> Blindness              | <input type="checkbox"/> Difficulty sitting           | <input type="checkbox"/> Radionecrosis         |
| <input type="checkbox"/> Bone fracture          | <input type="checkbox"/> Difficulty walking           | <input type="checkbox"/> Sexual dysfunction    |
| <input type="checkbox"/> Bowel obstruction      | <input type="checkbox"/> Double vision                | <input type="checkbox"/> Speech impediment     |
| <input type="checkbox"/> Chronic fatigue        | <input type="checkbox"/> Facial paralysis             | <input type="checkbox"/> Spinal fluid leak     |
| <input type="checkbox"/> Chronic infection      | <input type="checkbox"/> Fecal incontinence           | <input type="checkbox"/> Urinary retention     |
| <input type="checkbox"/> Chronic pain           | <input type="checkbox"/> Hearing loss                 | <input type="checkbox"/> Urinary incontinence  |
| <input type="checkbox"/> Chronic sinus problems | <input type="checkbox"/> Limb paralysis               | <input type="checkbox"/> None                  |
| <input type="checkbox"/> Cognitive impairment   | <input type="checkbox"/> Limb amputation              |                                                |
| <input type="checkbox"/> Colostomy              | <input type="checkbox"/> Limited mobility             |                                                |
| <input type="checkbox"/> Other (please explain) |                                                       |                                                |

## 11. Has anyone else in your family ever been diagnosed with chordoma?

- Yes
- No

# Chordoma Foundation - Chordoma Community Survey

## 1. Which of your relatives have been diagnosed with chordoma?

- |                                                 |                                           |
|-------------------------------------------------|-------------------------------------------|
| <input type="checkbox"/> Parent                 | <input type="checkbox"/> Aunt/Uncle       |
| <input type="checkbox"/> Child                  | <input type="checkbox"/> Cousin           |
| <input type="checkbox"/> Sibling                | <input type="checkbox"/> Distant Relative |
| <input type="checkbox"/> Grandparent            |                                           |
| <input type="checkbox"/> Other (please explain) |                                           |

## Interaction with the Chordoma Foundation

Please tell us about your interactions with the Chordoma Foundation

### 1. How did you first hear about the Chordoma Foundation?

- |                                                                               |                                                                  |
|-------------------------------------------------------------------------------|------------------------------------------------------------------|
| <input type="checkbox"/> Chordoma Foundation brochure in a clinic or hospital | <input type="checkbox"/> Healthcare provider                     |
| <input type="checkbox"/> Chordoma Foundation Facebook page                    | <input type="checkbox"/> Link from another website               |
| <input type="checkbox"/> Chordoma Survivors Facebook Group                    | <input type="checkbox"/> News story                              |
| <input type="checkbox"/> Facebook advertisement                               | <input type="checkbox"/> Online Chordoma Survivors Support Group |
| <input type="checkbox"/> Friend or family member                              | <input type="checkbox"/> Search engine                           |
| <input type="checkbox"/> Google advertisement                                 |                                                                  |
| <input type="checkbox"/> Other (please explain)                               |                                                                  |

## Chordoma Foundation - Chordoma Community Survey

### 2. Where were you (the patient) in your chordoma journey when you first heard about the Chordoma Foundation?

- Before onset of symptoms
- After onset of symptoms but before discovery of tumor
- After discovery of tumor but before being treated
- After first treatment
- After a recurrence was discovered
- I don't know where the patient was in his or her progression

# Chordoma Foundation - Chordoma Community Survey

## 3. In what ways has the Chordoma Foundation helped you? Please rank them from very helpful (1) to not at all helpful (5).

|                                                                            | 1 (Very Helpful)      | 2                     | 3                     | 4                     | 5 (Not Helpful)       | N/A                   |
|----------------------------------------------------------------------------|-----------------------|-----------------------|-----------------------|-----------------------|-----------------------|-----------------------|
| Gave me an opportunity to contribute my (the patient's) tissue to research | <input type="radio"/> | <input type="radio"/> | <input type="radio"/> | <input type="radio"/> | <input type="radio"/> | <input type="radio"/> |
| Gives me a sense of hope                                                   | <input type="radio"/> | <input type="radio"/> | <input type="radio"/> | <input type="radio"/> | <input type="radio"/> | <input type="radio"/> |
| Gives me a sense of purpose                                                | <input type="radio"/> | <input type="radio"/> | <input type="radio"/> | <input type="radio"/> | <input type="radio"/> | <input type="radio"/> |
| Gives me a way to show support for a friend or loved one                   | <input type="radio"/> | <input type="radio"/> | <input type="radio"/> | <input type="radio"/> | <input type="radio"/> | <input type="radio"/> |
| Helped me (the patient) avoid health problems                              | <input type="radio"/> | <input type="radio"/> | <input type="radio"/> | <input type="radio"/> | <input type="radio"/> | <input type="radio"/> |
| Helped me connect with others in the chordoma community                    | <input type="radio"/> | <input type="radio"/> | <input type="radio"/> | <input type="radio"/> | <input type="radio"/> | <input type="radio"/> |
| Helped me get emotional support                                            | <input type="radio"/> | <input type="radio"/> | <input type="radio"/> | <input type="radio"/> | <input type="radio"/> | <input type="radio"/> |
| Helped me (the patient) enroll in a clinical trial                         | <input type="radio"/> | <input type="radio"/> | <input type="radio"/> | <input type="radio"/> | <input type="radio"/> | <input type="radio"/> |
| Helped me find useful resources or information                             | <input type="radio"/> | <input type="radio"/> | <input type="radio"/> | <input type="radio"/> | <input type="radio"/> | <input type="radio"/> |
| Helped me (the patient) find experienced physicians                        | <input type="radio"/> | <input type="radio"/> | <input type="radio"/> | <input type="radio"/> | <input type="radio"/> | <input type="radio"/> |
| Helped me (the patient) get a diagnosis                                    | <input type="radio"/> | <input type="radio"/> | <input type="radio"/> | <input type="radio"/> | <input type="radio"/> | <input type="radio"/> |
| Helped me (the patient) obtain better care                                 | <input type="radio"/> | <input type="radio"/> | <input type="radio"/> | <input type="radio"/> | <input type="radio"/> | <input type="radio"/> |
| Helped me understand chordoma                                              | <input type="radio"/> | <input type="radio"/> | <input type="radio"/> | <input type="radio"/> | <input type="radio"/> | <input type="radio"/> |
| Helped me understand treatment options                                     | <input type="radio"/> | <input type="radio"/> | <input type="radio"/> | <input type="radio"/> | <input type="radio"/> | <input type="radio"/> |
| Keeps me informed about new research and treatment options                 | <input type="radio"/> | <input type="radio"/> | <input type="radio"/> | <input type="radio"/> | <input type="radio"/> | <input type="radio"/> |

# Chordoma Foundation - Chordoma Community Survey

## 4. What information on the Chordoma Foundation's website did you find useful? Select all that apply.

- |                                                                               |                                                                       |
|-------------------------------------------------------------------------------|-----------------------------------------------------------------------|
| <input type="checkbox"/> About chordoma                                       | <input type="checkbox"/> How to contribute tumor tissue for research  |
| <input type="checkbox"/> Chordoma Foundation research programs                | <input type="checkbox"/> How to raise money for the Foundation        |
| <input type="checkbox"/> Clinical trials list                                 | <input type="checkbox"/> Latest updates                               |
| <input type="checkbox"/> Doctor directory                                     | <input type="checkbox"/> Personalized oncology service providers list |
| <input type="checkbox"/> Donating to the Foundation                           | <input type="checkbox"/> Radiation therapy centers list               |
| <input type="checkbox"/> Getting support                                      | <input type="checkbox"/> Stories about other patients                 |
| <input type="checkbox"/> Helpful resources page                               | <input type="checkbox"/> Treatment options                            |
| <input type="checkbox"/> How to connect with others in the chordoma community | <input type="checkbox"/> The website was not helpful                  |
| <input type="checkbox"/> Other (please specify)                               |                                                                       |

## Improving Services to the Community

Help us learn how we can improve our services to chordoma patients, family, and friends.

### 1. What additional information should the Chordoma Foundation provide to the community?

### 2. What additional resources or services should the Chordoma Foundation provide to the community?

## Chordoma Foundation - Chordoma Community Survey

### 3. What information or advice do you wish you had received when you (or your friend/family member) were first diagnosed?

### 4. Where else have you found trusted information about chordoma?

|                      |                      |
|----------------------|----------------------|
| Information Source 1 | <input type="text"/> |
| Information Source 2 | <input type="text"/> |
| Information Source 3 | <input type="text"/> |
| Information Source 4 | <input type="text"/> |
| Information Source 5 | <input type="text"/> |

## Getting involved

Your involvement is important to our efforts to serve the chordoma community and advance research to improve the treatment of chordoma. We'd like to know how we can best work with you to accomplish our shared mission.

# Chordoma Foundation - Chordoma Community Survey

## 1. What motivates or inspires you to support this cause? Select all that apply.

- I want to help find a cure for myself
- I want to help find a cure for a friend or loved one
- I have been served by the Foundation and I want to give back
- I want to prevent others from facing the challenges that I have faced
- I want to help make sure that all chordoma patients get access to the best treatment possible
- I am impressed with the progress the Foundation has made
- Other (please explain)
- I am impressed with the Foundation's approach to advancing research
- I am inspired by the Foundation's team and/or story
- I view the Foundation as a model of effective medical research that could ultimately have an impact beyond chordoma
- I lost a loved one to chordoma and choose to honor their legacy through the Foundation
- I am close to someone affected by chordoma and show my care for them by supporting the Foundation



# Chordoma Foundation - Chordoma Community Survey

## 2. In which ways would you be interested in supporting this cause? Select all that apply.

- Contribute tissue to the Foundation's Biobank
  - Donate cash to the Foundation (including via check or credit card)
  - Donate stock or other property to the Foundation
  - Donate goods or professional services from my company
  - Encourage others to donate to the Foundation
  - Help organize a Chordoma Community Conference or educational event
  - Host a fundraiser for the Foundation
  - Include a bequest to the Foundation in my will
  - Introduce the Foundation to a potential philanthropist or other source(s) of capital
  - Other (please specify)
- Make a Perseverance Pledge to the Foundation (a monthly recurring donation)
  - Set up a Champion's Page (personal fundraising page)
  - Serve as a peer mentor for others in the chordoma community facing a similar situation
  - Serve as a regional ambassador for the Foundation
  - Share an Uncommon Story (a story of inspiration or hope on the Foundation's website)
  - Translate/communicate in foreign languages
  - Volunteer my skills (e.g. communications, social work, IT)
  - Volunteer on site at an upcoming Foundation event

## 3. Do you have any other comments or suggestions you would like to share with us?

## Keep In Touch

We would like to keep you updated with the latest information about chordoma research and treatment. If you would like to receive regular updates, please fill in the contact information below.

### 1. First Name

# Chordoma Foundation - Chordoma Community Survey

## 2. Last Name

## 3. Contact Information

Address 1:

Address 2:

City/Town:

State/Province:

ZIP/Postal Code:

Country:

Email Address:

Phone Number:

## Thank You

Thank you for completing this survey. We appreciate your feedback and look forward to using your suggestions to improve our services to chordoma patients and their families! If you have any questions, or would like to share additional information with us, please call us at 919-809-6779 or email us at [info@chordoma.org](mailto:info@chordoma.org)

If you or your loved one has been diagnosed with chordoma, please follow the links below to learn more about the services we offer and how we can help:

Newly Diagnosed Patients: <http://www.chordomafoundation.org/newly-diagnosed/>

Find a Doctor: <http://www.chordomafoundation.org/doctor-directory/>

Clinical Trials: <http://www.chordomafoundation.org/clinical-trials/>

Donate Tissue: <http://www.chordomafoundation.org/biobank/>

Get Support: <http://www.chordomafoundation.org/chordoma-support/>

Helpful Resources: <http://www.chordomafoundation.org/helpful-resources/>
